# Supplementary material
Source: PubMed Central journal article supplement (PMC3137124)

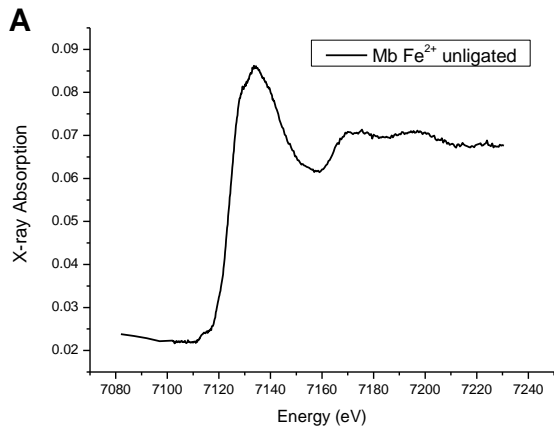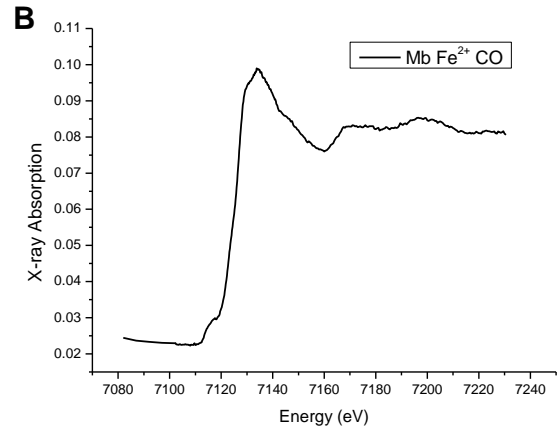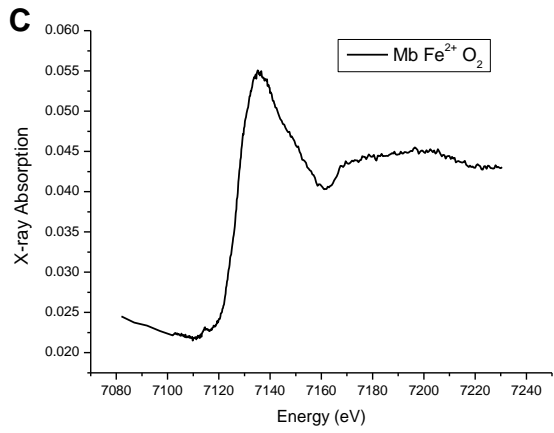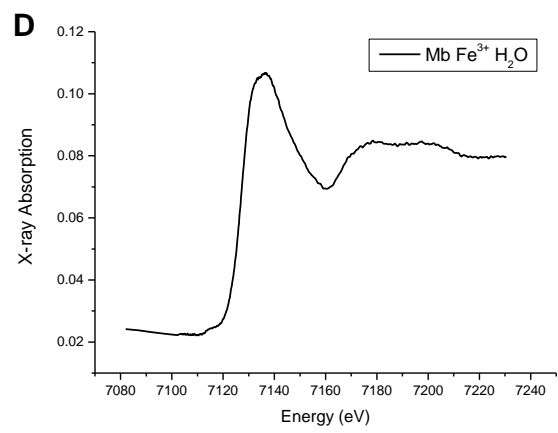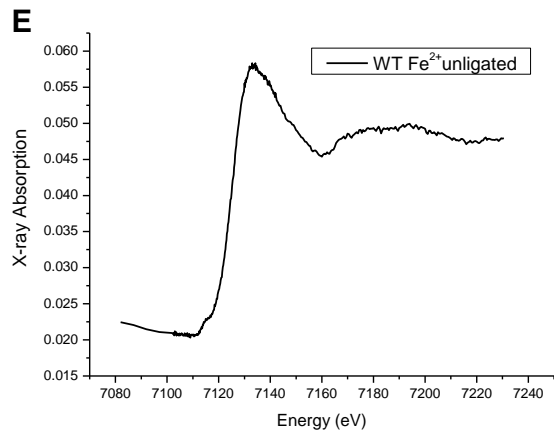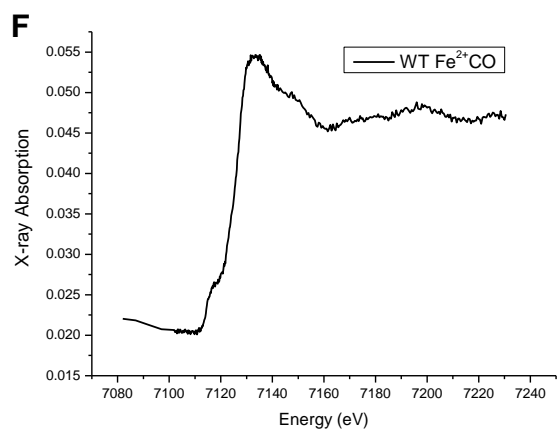

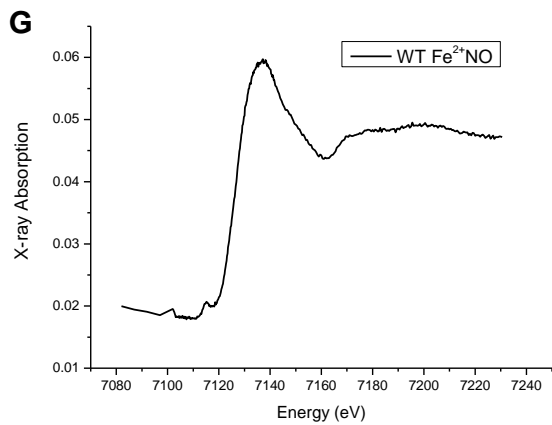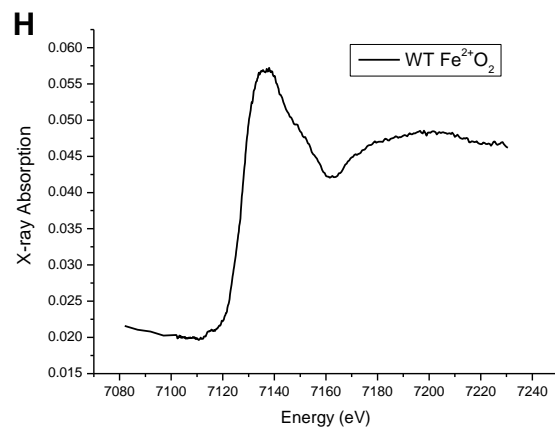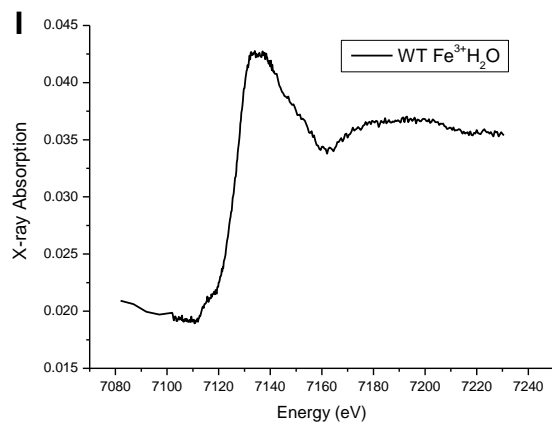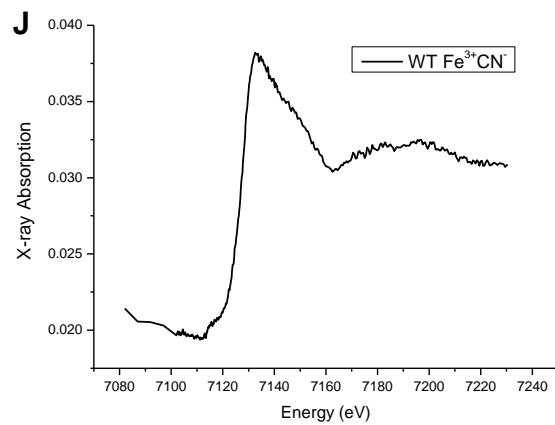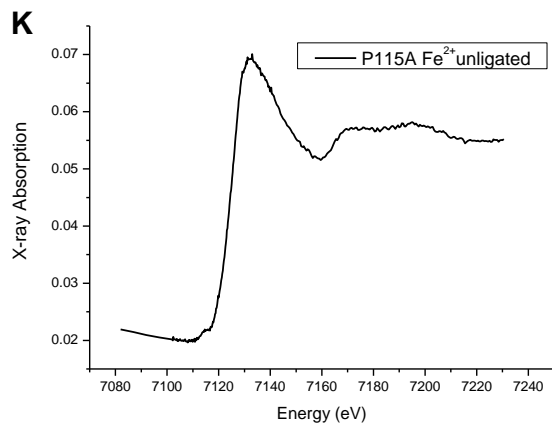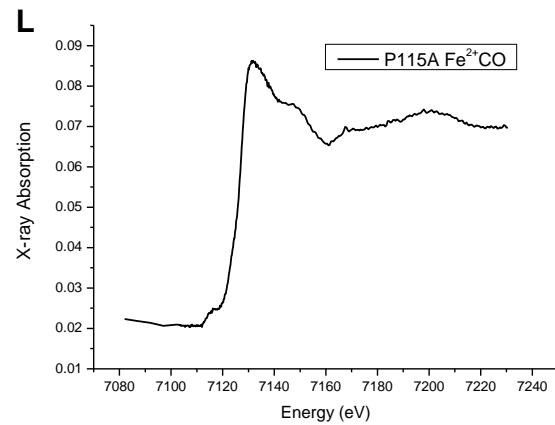

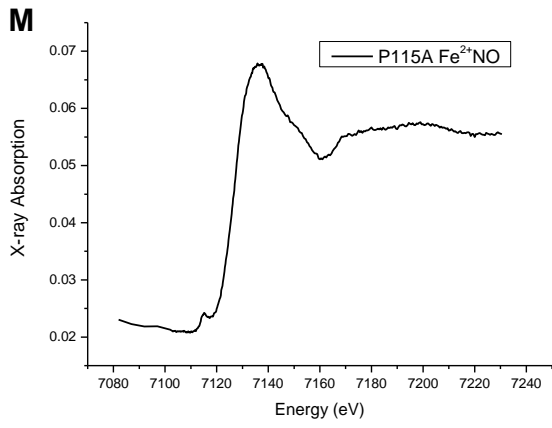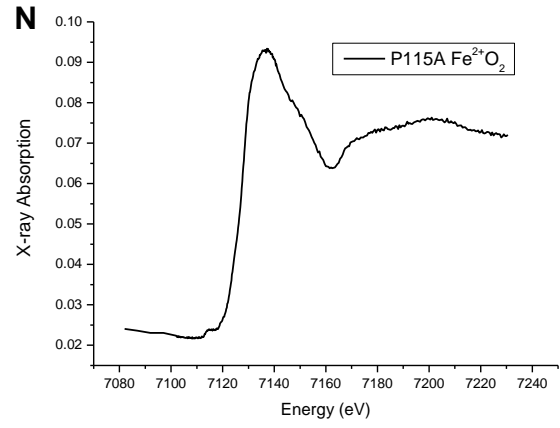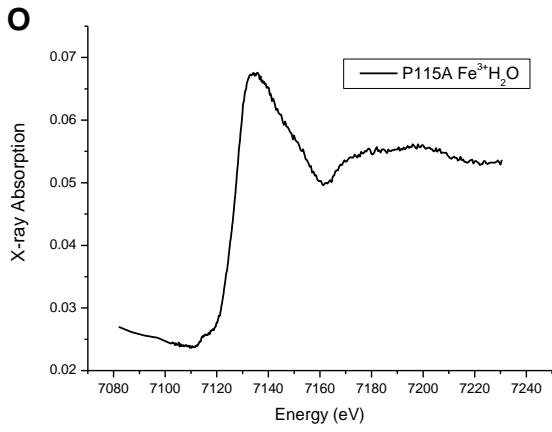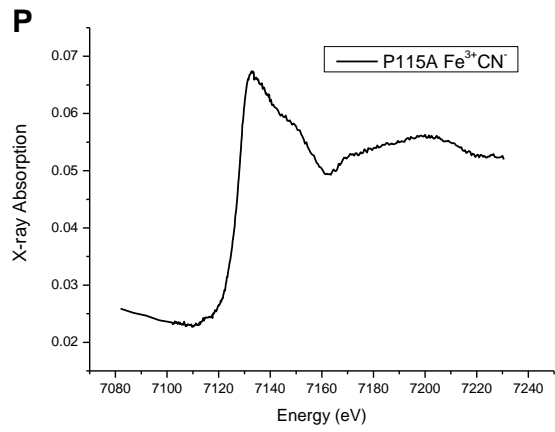

Supplement: NIHMS306276-supplement-01.pdf [file NIHMS306276-supplement-01.pdf]
